# Supplementary material
Source: PubMed Central journal article supplement (PMC3249587)

(Supplementary material)

**Common variants at the promoter region of the *APOM* confer a risk of rheumatoid arthritis**

Hea-Jin Hu<sup>1,2\*</sup>, Eun-Heui Jin<sup>3\*</sup>, Seon-Hee Yim<sup>1,4</sup>, So-Young Yang<sup>1,2</sup>, Seung-Hyun Jung<sup>1,2</sup>, Seung-Hun Shin<sup>1,2</sup>, Wan-Uk Kim<sup>5</sup>, Seung-Cheol Shim<sup>6</sup>, Tai-Gyu Kim<sup>2</sup> and Yeun-Jun Chung<sup>1,2</sup>

<sup>1</sup>Integrated Research Center for Genome Polymorphism, <sup>2</sup>Department of Microbiology, The Catholic University of Korea School of Medicine, Seoul, Korea; <sup>3</sup>Genome Research Center for Immune Disorders, School of Medicine, Wonkwang University, Iksan, Korea; <sup>4</sup>Department of Medical Humanities and Social Sciences, <sup>5</sup>Department of Internal Medicine, The Catholic University of Korea School of Medicine, Seoul, Korea; <sup>6</sup>Division of Rheumatology, Department of Internal Medicine, Eulji Medi-Bio Research Institute, Eulji University School of Medicine, Daejeon, Korea.

Supplementary Table 1. The GWAS result around the *APOM* gene (6p21.33)

| Probe set_id         | SNP             | Chr      | Position <sup>a</sup> | Allele 1/2 | Genotype count |           |           |            |            |           | Allele 1 Frequency |             | OR (95%CI)              | P-values         |
|----------------------|-----------------|----------|-----------------------|------------|----------------|-----------|-----------|------------|------------|-----------|--------------------|-------------|-------------------------|------------------|
|                      |                 |          |                       |            | Case           |           |           | Control    |            |           | Case               | Control     |                         |                  |
|                      |                 |          |                       |            | 11             | 12        | 22        | 11         | 12         | 22        |                    |             |                         |                  |
| SNP_A-2036273        | rs9267247       | 6        | 31,563,813            | A/C        | 3              | 35        | 62        | 42         | 209        | 346       | 0.21               | 0.25        | 0.81 (0.56-1.16)        | 0.2489           |
| SNP_A-4261049        | rs2516399       | 6        | 31,589,278            | C/T        | 6              | 37        | 57        | 13         | 175        | 412       | 0.25               | 0.17        | 1.66 (1.15-2.39)        | 0.007269         |
| SNP_A-2260321        | rs3131631       | 6        | 31,592,662            | C/G        | 73             | 24        | 3         | 449        | 138        | 13        | 0.85               | 0.86        | 1.11 (0.73-1.68)        | 0.6261           |
| SNP_A-2225620        | rs2734573       | 6        | 31,602,717            | A/C        | 50             | 41        | 9         | 262        | 272        | 64        | 0.71               | 0.67        | 0.84 (0.6-1.17)         | 0.2993           |
| SNP_A-1899463        | rs3115537       | 6        | 31,605,814            | C/G        | 86             | 13        | 0         | 518        | 59         | 3         | 0.93               | 0.94        | 1.18 (0.64-2.17)        | 0.5979           |
| SNP_A-4297469        | rs3093978       | 6        | 31,606,476            | G/T        | 1              | 13        | 86        | 3          | 77         | 518       | 0.08               | 0.07        | 1.09 (0.61-1.92)        | 0.7785           |
| SNP_A-1801089        | rs2516478       | 6        | 31,606,716            | A/G        | 4              | 25        | 71        | 18         | 182        | 400       | 0.17               | 0.18        | 0.92 (0.61-1.38)        | 0.6894           |
| SNP_A-1861524        | rs2071593       | 6        | 31,620,778            | A/G        | 0              | 11        | 89        | 0          | 94         | 506       | 0.06               | 0.08        | 0.64 (0.33-1.25)        | 0.1887           |
| SNP_A-4234652        | rs3219183       | 6        | 31,624,342            | C/G        | 0              | 10        | 90        | 0          | 86         | 514       | 0.05               | 0.07        | 0.64 (0.32-1.28)        | 0.2042           |
| SNP_A-2301199        | rs13215091      | 6        | 31,636,669            | C/T        | 90             | 10        | 0         | 514        | 85         | 1         | 0.95               | 0.93        | 0.64 (0.32-1.27)        | 0.1976           |
| SNP_A-2313167        | rs1799964       | 6        | 31,650,287            | C/T        | 6              | 32        | 62        | 38         | 200        | 361       | 0.22               | 0.23        | 0.97 (0.68-1.39)        | 0.8785           |
| SNP_A-2222440        | rs1052248       | 6        | 31,664,560            | A/T        | 5              | 27        | 68        | 36         | 217        | 346       | 0.19               | 0.24        | 0.73 (0.5-1.06)         | 0.09952          |
| SNP_A-2098264        | rs9348876       | 6        | 31,683,255            | A/G        | 1              | 20        | 79        | 3          | 136        | 461       | 0.11               | 0.12        | 0.89 (0.54-1.47)        | 0.6529           |
| SNP_A-4225289        | rs2857697       | 6        | 31,693,198            | A/G        | 46             | 37        | 15        | 188        | 265        | 136       | 0.66               | 0.54        | 0.66 (0.48-0.89)        | 0.006829         |
| SNP_A-1867270        | rs2736172       | 6        | 31,698,877            | C/T        | 16             | 42        | 41        | 174        | 274        | 146       | 0.37               | 0.52        | 1.73 (1.28-2.35)        | 0.0003701        |
| SNP_A-1912648        | rs1046089       | 6        | 31,710,946            | C/T        | 53             | 33        | 14        | 213        | 272        | 115       | 0.70               | 0.58        | 0.64 (0.47-0.88)        | 0.005843         |
| SNP_A-2280626        | rs2255741       | 6        | 31,713,146            | C/T        | 86             | 13        | 1         | 493        | 104        | 3         | 0.93               | 0.91        | 0.81 (0.46-1.43)        | 0.4691           |
| SNP_A-2098024        | rs760293        | 6        | 31,719,756            | C/T        | 84             | 14        | 1         | 477        | 117        | 6         | 0.92               | 0.89        | 0.74 (0.43-1.27)        | 0.2747           |
| SNP_A-2248558        | rs2077102       | 6        | 31,719,819            | A/C        | 7              | 23        | 70        | 26         | 210        | 364       | 0.19               | 0.22        | 0.82 (0.56-1.2)         | 0.2999           |
| SNP_A-1879350        | rs805301        | 6        | 31,726,100            | G/T        | 15             | 39        | 46        | 155        | 281        | 163       | 0.35               | 0.49        | 0.57 (0.42-0.78)        | 0.0004024        |
| SNP_A-1951804        | rs805300        | 6        | 31,726,546            | C/T        | 1              | 14        | 85        | 3          | 114        | 482       | 0.08               | 0.10        | 0.79 (0.45-1.37)        | 0.4              |
| <b>SNP_A-2274274</b> | <b>rs805297</b> | <b>6</b> | <b>31,730,585</b>     | <b>C/A</b> | <b>21</b>      | <b>51</b> | <b>28</b> | <b>238</b> | <b>272</b> | <b>60</b> | <b>0.47</b>        | <b>0.66</b> | <b>2.28 (1.65-3.14)</b> | <b>5.202E-07</b> |
| SNP_A-2268461        | rs2242655       | 6        | 31,735,428            | C/G        | 5              | 23        | 70        | 20         | 209        | 361       | 0.17               | 0.21        | 0.76 (0.5-1.13)         | 0.1768           |
| SNP_A-2309804        | rs707974        | 6        | 31,737,478            | C/T        | 0              | 18        | 82        | 3          | 75         | 521       | 0.09               | 0.07        | 1.31 (0.76-2.26)        | 0.3244           |
| SNP_A-4258142        | rs805268        | 6        | 31,746,157            | G/T        | 1              | 13        | 86        | 3          | 104        | 493       | 0.08               | 0.09        | 0.81 (0.46-1.43)        | 0.4691           |
| SNP_A-2253073        | rs2142234       | 6        | 31,747,108            | A/G        | 1              | 6         | 93        | 10         | 98         | 492       | 0.04               | 0.10        | 0.41 (0.2-0.85)         | 0.01683          |

|               |            |   |            |     |    |    |    |     |     |     |      |      |                  |           |
|---------------|------------|---|------------|-----|----|----|----|-----|-----|-----|------|------|------------------|-----------|
| SNP_A-4292023 | rs805267   | 6 | 31,747,736 | A/G | 1  | 14 | 85 | 4   | 114 | 482 | 0.08 | 0.10 | 0.78 (0.45-1.35) | 0.3659    |
| SNP_A-4240894 | rs9378164  | 6 | 31,751,501 | A/G | 1  | 15 | 84 | 1   | 112 | 487 | 0.09 | 0.10 | 0.85 (0.49-1.47) | 0.5538    |
| SNP_A-2257984 | rs376510   | 6 | 31,796,179 | C/T | 94 | 5  | 1  | 490 | 102 | 8   | 0.97 | 0.90 | 0.35 (0.16-0.76) | 0.008265  |
| SNP_A-4279910 | rs2299851  | 6 | 31,826,581 | C/T | 71 | 20 | 7  | 370 | 204 | 19  | 0.83 | 0.80 | 0.81 (0.55-1.21) | 0.313     |
| SNP_A-2057497 | rs707939   | 6 | 31,834,667 | G/T | 18 | 48 | 31 | 222 | 280 | 98  | 0.43 | 0.60 | 1.96 (1.44-2.67) | 2.012E-05 |
| SNP_A-1985618 | rs707937   | 6 | 31,838,993 | C/G | 50 | 35 | 15 | 227 | 299 | 74  | 0.68 | 0.63 | 0.8 (0.58-1.11)  | 0.1863    |
| SNP_A-4290666 | rs480092   | 6 | 31,872,878 | C/T | 4  | 26 | 69 | 41  | 227 | 320 | 0.17 | 0.26 | 0.59 (0.4-0.87)  | 0.008086  |
| SNP_A-1828154 | rs2075800  | 6 | 31,885,925 | A/G | 31 | 48 | 21 | 102 | 282 | 216 | 0.55 | 0.41 | 1.76 (1.3-2.38)  | 0.0002455 |
| SNP_A-1867908 | rs2763979  | 6 | 31,902,571 | C/T | 55 | 33 | 12 | 210 | 278 | 105 | 0.72 | 0.59 | 0.59 (0.43-0.82) | 0.00155   |
| SNP_A-2217703 | rs11965547 | 6 | 31,944,130 | C/T | 72 | 22 | 6  | 375 | 202 | 22  | 0.83 | 0.79 | 0.79 (0.53-1.17) | 0.234     |
| SNP_A-4235594 | rs486416   | 6 | 31,964,049 | A/G | 85 | 12 | 3  | 497 | 103 | 0   | 0.91 | 0.91 | 1.03 (0.6-1.77)  | 0.9057    |
| SNP_A-2188055 | rs9267673  | 6 | 31,991,658 | A/G | 1  | 5  | 94 | 6   | 101 | 492 | 0.04 | 0.09 | 0.36 (0.17-0.79) | 0.01112   |
| SNP_A-2225939 | rs644045   | 6 | 31,991,936 | C/T | 83 | 14 | 3  | 469 | 130 | 1   | 0.90 | 0.89 | 0.87 (0.52-1.45) | 0.5851    |
| SNP_A-1923640 | rs2072633  | 6 | 32,027,557 | A/G | 24 | 51 | 25 | 120 | 302 | 178 | 0.50 | 0.45 | 1.19 (0.88-1.61) | 0.2713    |

<sup>a</sup>Based on NCBI human genome build 36.3 (hg18).  
Platform: Affymetrix SNP array 5.0

Supplementary Table 2. Pairwise linkage disequilibrium among four SNPs in *APOM* with 48 Korean subjects

|                     | SNP1<br>(rs1266078) | SNP2<br>(rs805297) | SNP3<br>(rs9404941) | SNP4<br>(rs805296) |
|---------------------|---------------------|--------------------|---------------------|--------------------|
| SNP1<br>(rs1266078) |                     |                    |                     |                    |
| SNP2<br>(rs805297)  | 0.096               | $r^2$              |                     |                    |
| SNP3<br>(rs9404941) | 0.010               | 0.061              | $r^2$               |                    |
| SNP4<br>(rs805296)  | 0.304               | 0.029              | 0.021               | $r^2$              |

Supplementary Table 3. Summary of information for the subjects of rheumatoid arthritis (RA) and healthy control

| Study set          | Genotyping method   | Number  | Female (%) | Age (Mean ± SD) | Status *    | RF (%)      | Anti-CCP (%)                   | BD (%)                         | BE (%)                         | JSN (%)                        |                                |
|--------------------|---------------------|---------|------------|-----------------|-------------|-------------|--------------------------------|--------------------------------|--------------------------------|--------------------------------|--------------------------------|
| GWAS discovery set | Affymetrix 5.0      | RA      | 100        | 81.0            | 54.1 ± 11.4 | +<br>-<br>N | 72 (72.0)<br>28 (28.0)<br>0    | 54 (63.5)<br>31 (36.5)<br>15   | N                              | N                              | N                              |
|                    |                     | Control | 600        | 76.0            | 52.4 ± 9.1  |             |                                |                                |                                |                                |                                |
| Replication set    | TaqMan assay & RFLP | RA      | 578        | 81.1            | 53.2 ± 12.0 | +<br>-<br>N | 389 (70.7)<br>161 (29.3)<br>28 | 309 (84.4)<br>57 (15.6)<br>212 | 85 (35.6)<br>154 (64.4)<br>339 | 177 (75.0)<br>59 (25.0)<br>342 | 164 (69.2)<br>73 (30.8)<br>341 |
|                    |                     | Control | 711        | 63.6            | 52.3 ± 12.9 |             |                                |                                |                                |                                |                                |

RF: Rheumatoid factor, Anti-CCP: anti-cyclic citrullinated peptide, BD: Bone deformity, BE: Bone erosion, JSN: Joint space narrowing  
 \*+, positive; -, negative; N, no information

Supplementary Table 4. Primer sequences used for *APOM* gene amplification, sequence analysis and genotyping

| Application     | Name                 | Primer/probe sequence (5' → 3')                       | Region                       |
|-----------------|----------------------|-------------------------------------------------------|------------------------------|
| PCR analysis    | PF1                  | CCTAGTAGGGACCACAGATGCAC                               | 5' flanking region and exon1 |
|                 | PR1                  | TCCAGTCATCCTAGGCCATC                                  |                              |
|                 | EF2                  | GGGGTTTACCCAGTTGACT                                   | exon2 ~ 6                    |
|                 | ER2                  | GGAGACAAACCCAGAATGA                                   |                              |
| Sequencing      | SR1                  | GCTTGGGCGACAGAGACT                                    | 5' flanking region           |
|                 | SF1                  | CCATGTGCAAGTCTTTGCTA                                  | 5' flanking region           |
|                 | SF2                  | TTGAGTGAATGTGTCAGTGAA                                 | 5' flanking region           |
| TaqMan analysis | <u>C__7514748_10</u> | ABI assay-on-demand <u>C__7514748_10</u> <sup>a</sup> | rs805297                     |
|                 | TF2                  | AACAAAATTTGGGTGACCAGTATATTAGAGTTTA                    |                              |
|                 | TR2                  | CAACAGAACGAGACTCCCATCT                                | rs1266078                    |
|                 | probe2V              | VIC-TGTAATGTTTGAATTTTT                                |                              |
|                 | probe2F              | FAM-AATGTTTGCATTTTT                                   |                              |
| RFLP analysis   | RF1                  | CAGTTAGGGGTTGGTGGTGT                                  | rs9404941 and rs805296       |
|                 | RR1                  | TGAGCCCAGGAGTTCAAAC                                   |                              |

<sup>a</sup> Predesigned Assay-on-demand from Applied Biosystems.

### Supplementary Figure 1

Quantile-Quantile plot (QQ-plot) of  $P$ -values obtained from the genome-wide association study (GWAS). The QQ-plot is drawn with a logarithmic scale. The expected  $P$ -values are presented on the x-axis and the observed  $P$ -values are on the y-axis. The black curve is for the  $P$ -values obtained from the logistic regression test using the whole SNPs before SNP quality control and the blue curve is for the  $P$ -values after quality control.

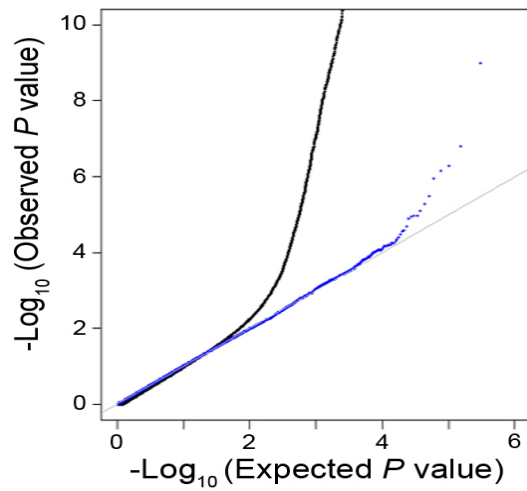

Supplementary Figure 2.

The  $-\log_{10}(P\text{-value})$  of SNPs identified from GWAS as strongly associated with RA. SNPs are represented with diamond dots and the most associated SNP was marked with the largest diamond. The strength of LD relationship ( $r^2$ ) between the most associated SNP and the other SNPs is presented with red color intensities based on the JPT + CHB Hapmap data. The background recombination rate curve is drawn with the JPT + CHB Hapmap data (light blue curve).

a

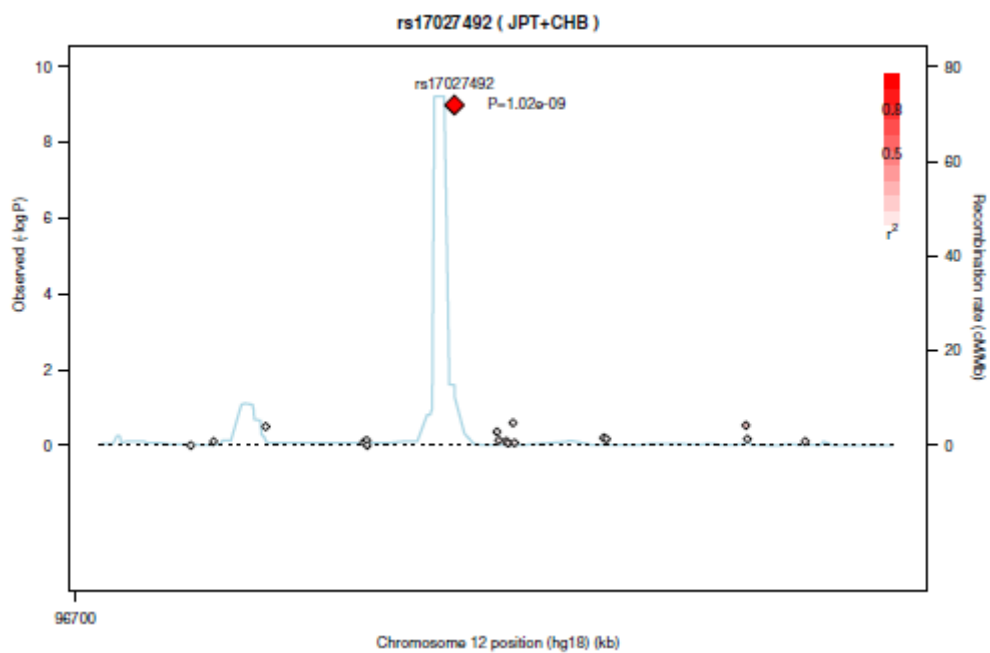

b

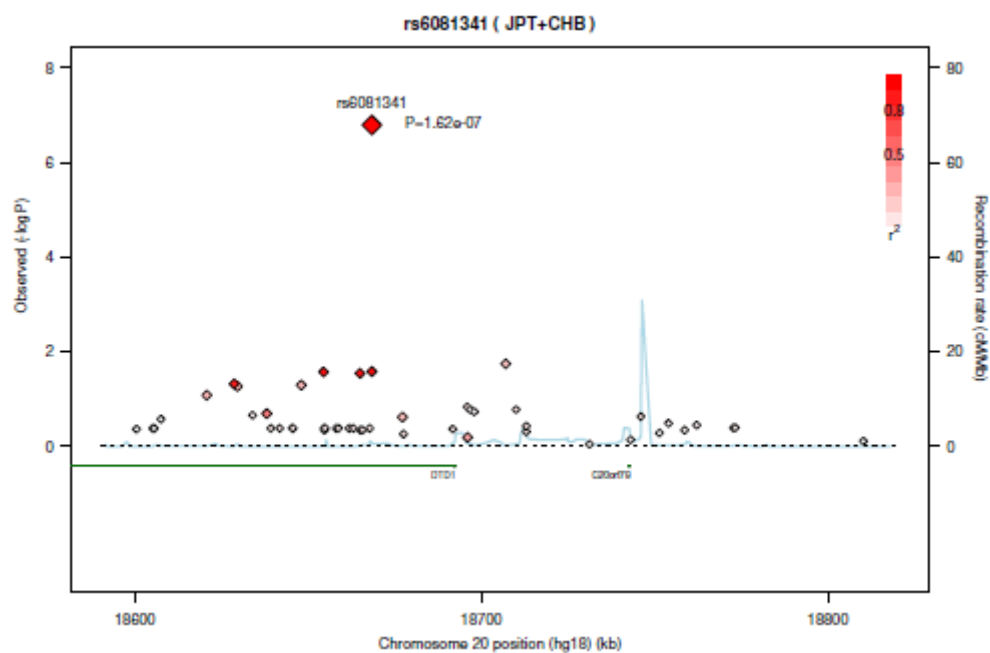





e

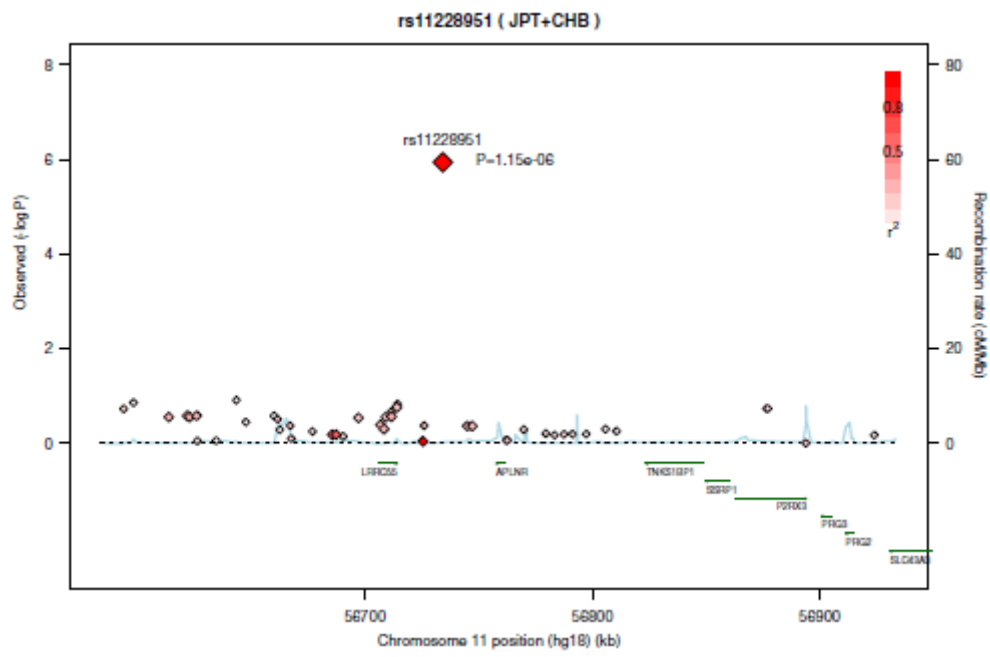

f

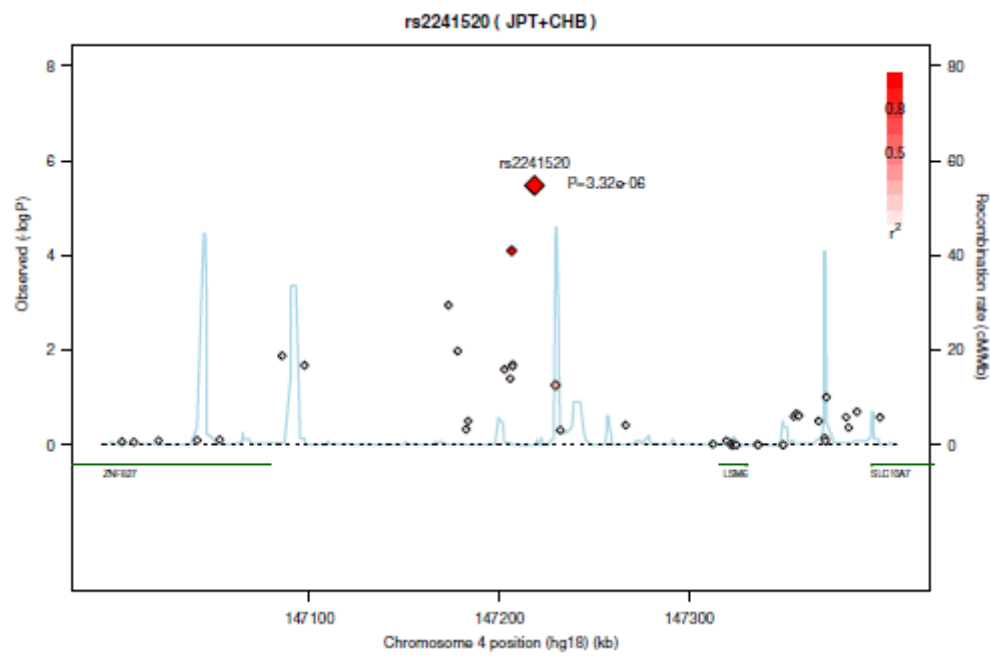

g

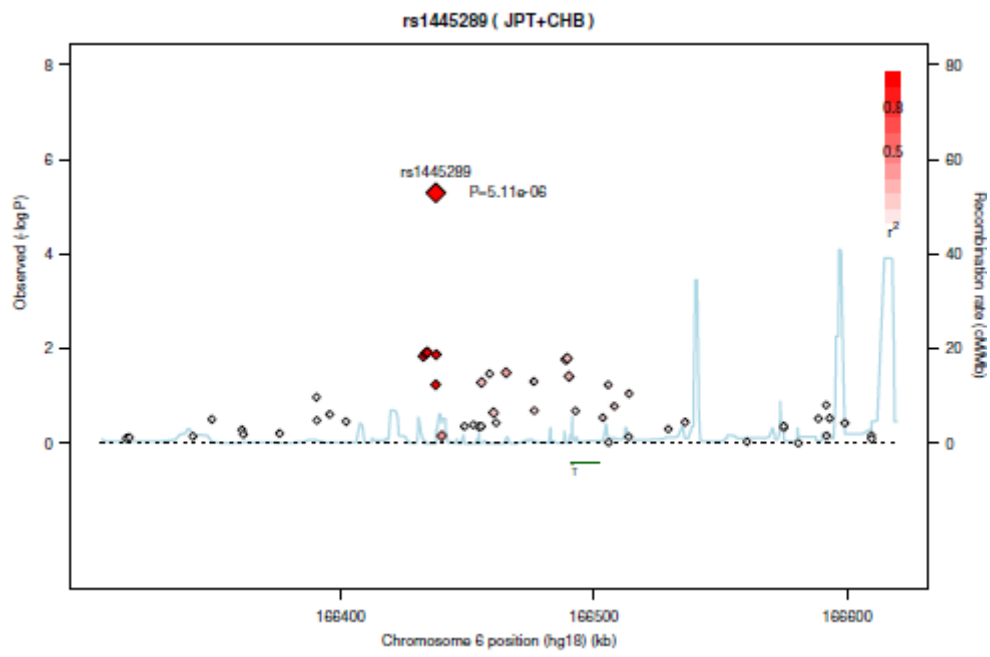

h

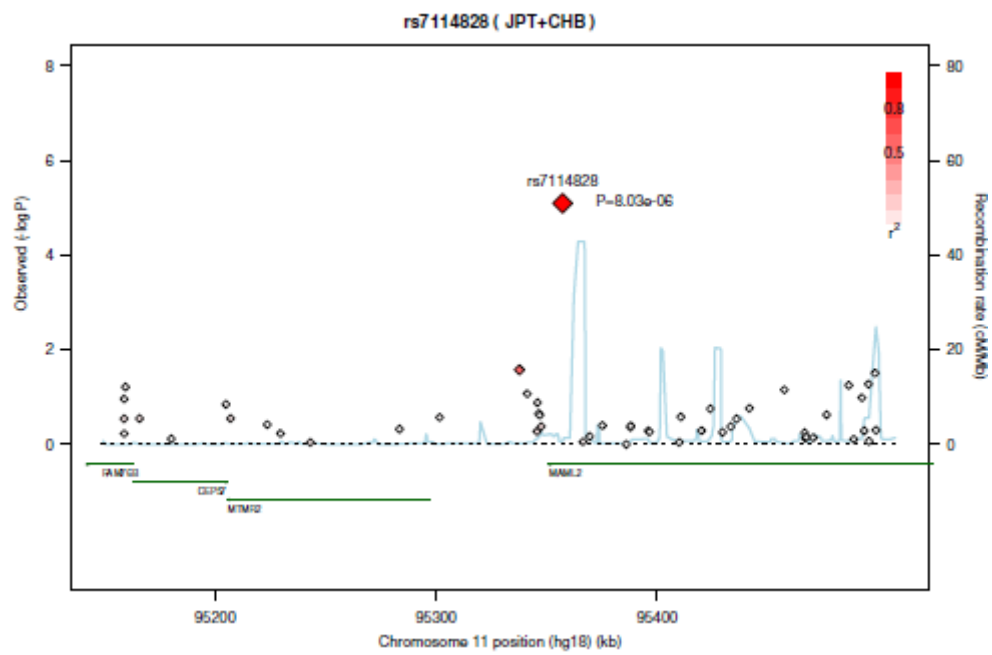

Supplement: emm-43-613-s001.pdf [file emm-43-613-s001.pdf]
